# Supplementary material
Source: PubMed Central journal article supplement (PMC5885245)
Supplement: jamaoncol-4-e180077-s001.pdf [file jamaoncol-4-e180077-s001.pdf]

## Supplementary Online Content

D'Angelo SP, Russell J, Lebbé C, et al. Efficacy and safety of first-line avelumab treatment in patients with stage IV metastatic Merkel cell carcinoma: a preplanned interim analysis. *JAMA Oncol*. Published online March 22, 2018. doi:10.1001/jamaoncol.2018.0077

**eTable 1.** JAVELIN Merkel 200 Part B Study Group

**eTable 2.** Patient Demographics and Baseline Characteristics

**eTable 3.** Incidence of Treatment-Related Adverse Events

**eTable 4.** Immune-Related Adverse Events

This supplementary material has been provided by the authors to give readers additional information about their work.

**eTable 1. JAVELIN Merkel 200 Part B Study Group**

| <b>Principal Investigator</b> | <b>Site – Country</b> | <b>Site – Institution</b>                                           |
|-------------------------------|-----------------------|---------------------------------------------------------------------|
| Arance Fernandez, Ana M       | Spain                 | Hospital Clinic i Provincial de Barcelona                           |
| Ascierto, Paolo               | Italy                 | Istituto Nazionale Tumori Fondazione G.Pascale                      |
| Atkinson, Victoria            | Australia             | Princess Alexandra Hospital                                         |
| Aubin, François               | France                | CHU Besançon - Hôpital Jean Minjoz                                  |
| Bedane, Christophe            | France                | CHU de Limoges - Hôpital Dupuytren                                  |
| Begbie, Stephen               | Australia             | Port Macquarie Base Hospital                                        |
| Berrocal Jaime, Alfonso       | Spain                 | Hospital General Universitario de Valencia                          |
| Bhatia, Shailender            | United States         | University of Washington - Seattle Cancer Care Alliance             |
| Brownell, Isaac               | United States         | National Cancer Institute                                           |
| Burgess, Melissa              | United States         | University of Pittsburgh                                            |
| Buzzoni, Roberto              | Italy                 | Fondazione IRCCS Istituto Nazionale dei Tumori                      |
| Capdevila Castillon, Jaume    | Spain                 | Hospital Universitari Vall d'Hebron                                 |
| Chiarion Sileni, Vanna        | Italy                 | IOV - Istituto Oncologico Veneto IRCCS                              |
| Chmielowski, Bartosz          | United States         | UCLA Medical Center                                                 |
| Dalac-Rat, Sophie             | France                | CHU de Dijon - Hôpital du Bocage                                    |
| D'Angelo, Sandra P            | United States         | Memorial Sloan Kettering Cancer Center                              |
| Dreno, Brigitte               | France                | CHU Nantes - Hôtel Dieu                                             |
| Dutriaux, Caroline            | France                | Groupe Hospitalier Saint André - Hôpital Saint André                |
| Ernst, Donald                 | Canada                | London Health Sciences Centre                                       |
| Fazio, Nicola                 | Italy                 | IEO Istituto Europeo di Oncologia                                   |
| Ferolla, Piero                | Italy                 | Azienda Ospedaliera di Perugia Ospedale S. Maria della Misericordia |
| Fluck, Michael                | Germany               | Fachklinik Hornheide                                                |
| Gambichler, Thilo             | Germany               | St. Josef-Hospital Universitaetsklinikum                            |
| Grignani, Giovanni            | Italy                 | Fondazione del Piemonte per l'Oncologia IRCC Candiolo               |
| Grob, Jean-Jacques            | France                | Hôpital de la Timone                                                |
| Guminski, Alexander           | Australia             | Royal North Shore Hospital                                          |
| Hamid, Omid                   | United States         | The Angeles Clinic and Research Institute - West LA                 |
| Hassel, Jessica               | Germany               | Universitaetsklinikum Heidelberg                                    |
| Herbst, Rudolf                | Germany               | Helios Klinikum Erfurt                                              |
| Hernandez-Aya, Leonel         | United States         | Washington University                                               |
| Hogg, David                   | Canada                | Princess Margaret Hospital                                          |

| <b>Principal Investigator</b> | <b>Site – Country</b> | <b>Site – Institution</b>                                       |
|-------------------------------|-----------------------|-----------------------------------------------------------------|
| Kaehler, Katharina            | Germany               | Universitaetsklinikum Schleswig-Holstein                        |
| Kaufmann, Roland              | Germany               | Klinikum der Johann Wolfgang Goethe-Universitaet                |
| Kiecker, Felix                | Germany               | Charite Universitaetsmedizin Berlin - Campus Charite Mitte      |
| Kiyohara, Yoshio              | Japan                 | Shizuoka Cancer Center                                          |
| Lacour, Jean-Philippe         | France                | CHU Nice - Hopital de l Archet 2                                |
| Lebbé, Céleste                | France                | Hôpital Saint-Louis                                             |
| Leccia, Marie-Thérèse         | France                | CHU de Grenoble - Hôpital André Michallon                       |
| Lewis, Karl                   | United States         | University of Colorado Health                                   |
| Lopez Martin, Jose Antonio    | Spain                 | Hospital Universitario 12 de Octubre                            |
| Maio, Michele                 | Italy                 | A.O.U. Senese Policlinico Santa Maria alle Scotte               |
| Marquez Rodas, Ivan           | Spain                 | Hospital General Universitario Gregorio Marañon                 |
| Mauch, Cornelia               | Germany               | Universitaetsklinikum Koeln                                     |
| Meier, Friedegund             | Germany               | Universitaetsklinikum Carl Gustav Carus TU Dresden              |
| Meyer, Nicolas                | France                | CHU de Toulouse - Hôpital Larrey                                |
| Milella, Michele              | Italy                 | Istituto Nazionale Tumori Regina Elena IRCCS                    |
| Mortier, Laurent              | France                | Hopital Claude Huriez - CHU Lille                               |
| Olszanski, Anthony            | United States         | Fox Chase Cancer Center                                         |
| Pinto, Carmine                | Italy                 | Arcispedale S. Maria Nuova Azienda Ospedaliera di Reggio Emilia |
| Rabinowits, Guilherme         | United States         | Dana Farber Cancer Institute                                    |
| Robert, Caroline              | France                | Institut Gustave Roussy                                         |
| Russel, Jeffrey               | United States         | H. Lee Moffitt Cancer Center and Research Institute, Inc        |
| Saiag, Philippe               | France                | Hôpital Ambroise Paré - Boulogne-Billancourt                    |
| Samimi, Mahtab                | France                | CHU Tours - Hôpital Trousseau                                   |
| Sandhu, Shahneen              | Australia             | Peter MacCallum Cancer Centre                                   |
| Staub, Janina                 | Germany               | Universitaetsklinikum Hamburg-Eppendorf                         |
| Terheyden, Patrick            | Germany               | Universitaetsklinikum Schleswig Holstein - Campus Luebeck       |
| Thomas, Luc                   | France                | Centre Hospitalier Lyon Sud                                     |
| Van Hagen, Thomas             | Australia             | St John of God Subiaco Hospital                                 |
| Walker, John                  | Canada                | Cross Cancer Institute                                          |
| Yamazaki, Naoya               | Japan                 | National Cancer Center Hospital                                 |

**eTable 2. Patient Demographic and Baseline Characteristics**

| <b>Characteristic</b>                                                                                                 | <b>N = 39</b>                               |
|-----------------------------------------------------------------------------------------------------------------------|---------------------------------------------|
| Age, No. (%)<br>< 65 years<br>≥ 65 years<br>Median (range), years                                                     | 8 (20.5)<br>31 (79.5)<br>75.0 (47-88)       |
| Sex, No. (%)<br>Male<br>Female                                                                                        | 30 (76.9)<br>9 (23.1)                       |
| Race, No. (%)<br>White<br>Black or African American<br>Not collected at the site<br>Unknown                           | 33 (84.6)<br>1 (2.6)<br>4 (10.3)<br>1 (2.6) |
| Eastern Cooperative Oncology Group performance status, No. (%)<br>0<br>1                                              | 31 (79.5)<br>8 (20.5)                       |
| Site of primary tumor, No. (%) <sup>a</sup><br>Skin                                                                   | 39 (100.0)                                  |
| Visceral metastases at baseline, No, (%)<br>Present<br>Absent<br>Missing <sup>b</sup>                                 | 26 (66.7)<br>8 (20.5)<br>5 (12.8)           |
| Time from initial diagnosis to study entry, months<br>Median<br>Range                                                 | 13.0<br>0.7-120.9                           |
| Time since first metastatic disease diagnosis, months<br>Median<br>Range                                              | 3.1<br>0.6-27.7                             |
| Prior chemotherapy, No. (%)<br>Yes<br>No                                                                              | 5 (12.8)<br>34 (87.2)                       |
| Receiving prior chemotherapy, per disease state, No. (%)<br>Neoadjuvant<br>Adjuvant<br>Locally advanced<br>Metastatic | 0<br>3 (7.7)<br>2 (5.1)<br>0                |

<sup>a</sup> There were no cases of unknown primary tumor.

<sup>b</sup> Tumor assessment per independent review committee was not available at the time of data cutoff.

**eTable 3. Incidence of Treatment-Related Adverse Events**

| <b>Treatment-Related Adverse Event</b> | <b>Any Grade, n (%)</b> | <b>Grade ≥3, n (%)</b> |
|----------------------------------------|-------------------------|------------------------|
| Any                                    | 28 (71.8)               | 8 (20.5)               |
| Fatigue                                | 9 (23.1)                | 0                      |
| Infusion-related reaction              | 9 (23.1)                | 1 (2.6)                |
| Asthenia                               | 3 (7.7)                 | 0                      |
| Lipase increased                       | 3 (7.7)                 | 1 (2.6)                |
| Elevated ALT                           | 3 (7.7)                 | 1 (2.6)                |
| Arthralgia                             | 2 (5.1)                 | 0                      |
| Blood CPK increased                    | 2 (5.1)                 | 1 (2.6)                |
| Chills                                 | 2 (5.1)                 | 0                      |
| Diarrhea                               | 2 (5.1)                 | 0                      |
| Dry mouth                              | 2 (5.1)                 | 0                      |
| Dyspnea                                | 2 (5.1)                 | 0                      |
| Eosinophilia                           | 2 (5.1)                 | 0                      |
| Nausea                                 | 2 (5.1)                 | 0                      |
| Pruritus <sup>a</sup>                  | 2 (5.1)                 | 0                      |
| Pyrexia                                | 2 (5.1)                 | 0                      |
| Rash maculo-papular <sup>a</sup>       | 2 (5.1)                 | 0                      |
| Weight decreased                       | 2 (5.1)                 | 0                      |
| Autoimmune nephritis                   | 1 (2.6)                 | 1 (2.6)                |
| Cholangitis                            | 1 (2.6)                 | 1 (2.6)                |
| Elevated AST                           | 1 (2.6)                 | 1 (2.6)                |
| Gait disturbance                       | 1 (2.6)                 | 1 (2.6)                |
| Paraneoplastic encephalomyelitis       | 1 (2.6)                 | 1 (2.6)                |
| Polyneuropathy                         | 1 (2.6)                 | 1 (2.6)                |
| Paraneoplastic syndrome                | 1 (2.6)                 | 1 (2.6)                |
| Troponin increased                     | 1 (2.6)                 | 1 (2.6)                |

ALT, alanine aminotransferase; AST, aspartate aminotransferase; CPK, creatine phosphokinase.

Adverse events of any grade in at least 5% of patients or any grade 3 adverse event.

<sup>a</sup> One event of pruritus and 2 events of rash maculo-papular were also considered immune-related adverse events.

**eTable 4. Immune-Related Adverse Events**

| <b>Event</b>   | <b>CTCAE grade</b> | <b>Action Taken With Study Treatment</b> | <b>Outcome<sup>a</sup></b> | <b>Serious Adverse Event?</b> |
|----------------|--------------------|------------------------------------------|----------------------------|-------------------------------|
| Rash           | 1                  | Dose not changed                         | Recovered/resolved         | No                            |
| Pruritus       | 1                  | Dose not changed                         | Not recovered/not resolved | No                            |
| Pruritus       | 1                  | Dose not changed                         | Recovered/resolved         | No                            |
| Hypothyroidism | 1                  | Not applicable                           | Recovered/resolved         | No                            |
| Rash           | 1                  | Dose not changed                         | Not recovered/not resolved | No                            |
| Pruritus       | 1                  | Dose not changed                         | Recovered/resolved         | No                            |

<sup>a</sup> This is an interim analysis and events may have resolved subsequent to the data cutoff.
